# Supplementary material
Source: PubMed Central journal article supplement (PMC3244538)
Supplement: NIHMS336228-supplement-02.pdf [file NIHMS336228-supplement-02.pdf]

## Supplementary Table 1

### Human hepatocytes for karyotype analysis

| ID | Processing                           | Age (years) | Gender | Disposition                    | Chemo-therapy | Cold ischemia (h) |
|----|--------------------------------------|-------------|--------|--------------------------------|---------------|-------------------|
| H1 | Freshly-isolated                     | 1           | Male   | Anoxia                         | No            | <36               |
| H2 | Cryopreserved                        | 3           | Male   | Maple syrup urine disease      | No            | <36               |
| H3 | Freshly-isolated                     | 11          | Male   | N/A                            | N/A           | N/A               |
| H4 | Freshly-isolated from chimeric mouse | 15          | Male   | Anoxia; motor vehicle accident | No            | <36               |
| H5 | Freshly-isolated from chimeric mouse | 18          | Female | Focal nodular hyperplasia      | No            | <36               |

### Human hepatocytes for interphase FISH analysis

| ID                   | Processing       | Age (years) | Gender | Disposition               | Chemo-therapy | Cold ischemia (h) |
|----------------------|------------------|-------------|--------|---------------------------|---------------|-------------------|
| <i>Young donors</i>  |                  |             |        |                           |               |                   |
| H6                   | Cryopreserved    | 2           | Female | Anoxia; drowning          | No            | 29                |
| H7                   | Cryopreserved    | 5           | Female | Anoxia; drowning          | No            | 26                |
| H8                   | Cryopreserved    | 7           | Female | Meningitis                | No            | 6                 |
| H9                   | Cryopreserved    | 10          | Male   | Crigler Najjar Syndrome   | No            | 26                |
| <i>Adult donors</i>  |                  |             |        |                           |               |                   |
| H10                  | Cryopreserved    | 11          | Female | Intracranial hemorrhage   | No            | 10                |
| H11                  | Cryopreserved    | 23          | Male   | Gunshot wound to head     | No            | 21                |
| H12                  | Cryopreserved    | 26          | Female | Intracranial hemorrhage   | No            | <36               |
| H13                  | Freshly-isolated | 29          | Female | Focal nodular hyperplasia | No            | <36               |
| H14                  | Freshly-isolated | 30          | Female | Hepatocellular adenoma    | No            | <36               |
| H15                  | Cryopreserved    | 30          | Male   | Intracranial hemorrhage   | No            | <36               |
| H16                  | Cryopreserved    | 35          | Male   | Intracranial hemorrhage   | No            | 29                |
| <i>Senior donors</i> |                  |             |        |                           |               |                   |
| H17                  | Freshly-isolated | 48          | Female | Stroke                    | No            | 14                |
| H18                  | Cryopreserved    | 66          | Male   | Intracranial hemorrhage   | No            | 24                |
| H19                  | Cryopreserved    | 69          | Male   | Stroke                    | No            | <36               |
| H20                  | Cryopreserved    | 69          | Female | Closed head injury/fall   | No            | 19                |
| H21                  | Cryopreserved    | 72          | Female | Stroke                    | No            | 9                 |

### Human T lymphocytes for interphase FISH analysis

| ID        | Processing                   | Age (years) | Gender | Disposition   |
|-----------|------------------------------|-------------|--------|---------------|
| Control-1 | Cryopreserved; FACS-isolated | N/A         | Male   | Healthy donor |
| Control-2 | Cryopreserved; FACS-isolated | N/A         | Female | Healthy donor |
| Control-3 | Cryopreserved; FACS-isolated | N/A         | Female | Healthy donor |

Human hepatocytes used for karyotypes and interphase FISH analysis were isolated from either primary donors (samples H1-H3 and H6-H21) or chimeric mice with livers repopulated by primary human hepatocytes (samples H4 and H5). Hepatocytes were isolated from healthy liver tissue; cold ischemia time ranged from 6h to <36h. All patients were negative for Hepatitis B, Hepatitis C and HIV. None of the patients suffered from autoimmune disease. None of the patients received chemotherapeutic agents (with the possible exception of H3 where this information was not available). T lymphocytes were isolated from mobilized peripheral blood obtained from healthy donors.

## Supplementary Figure 1

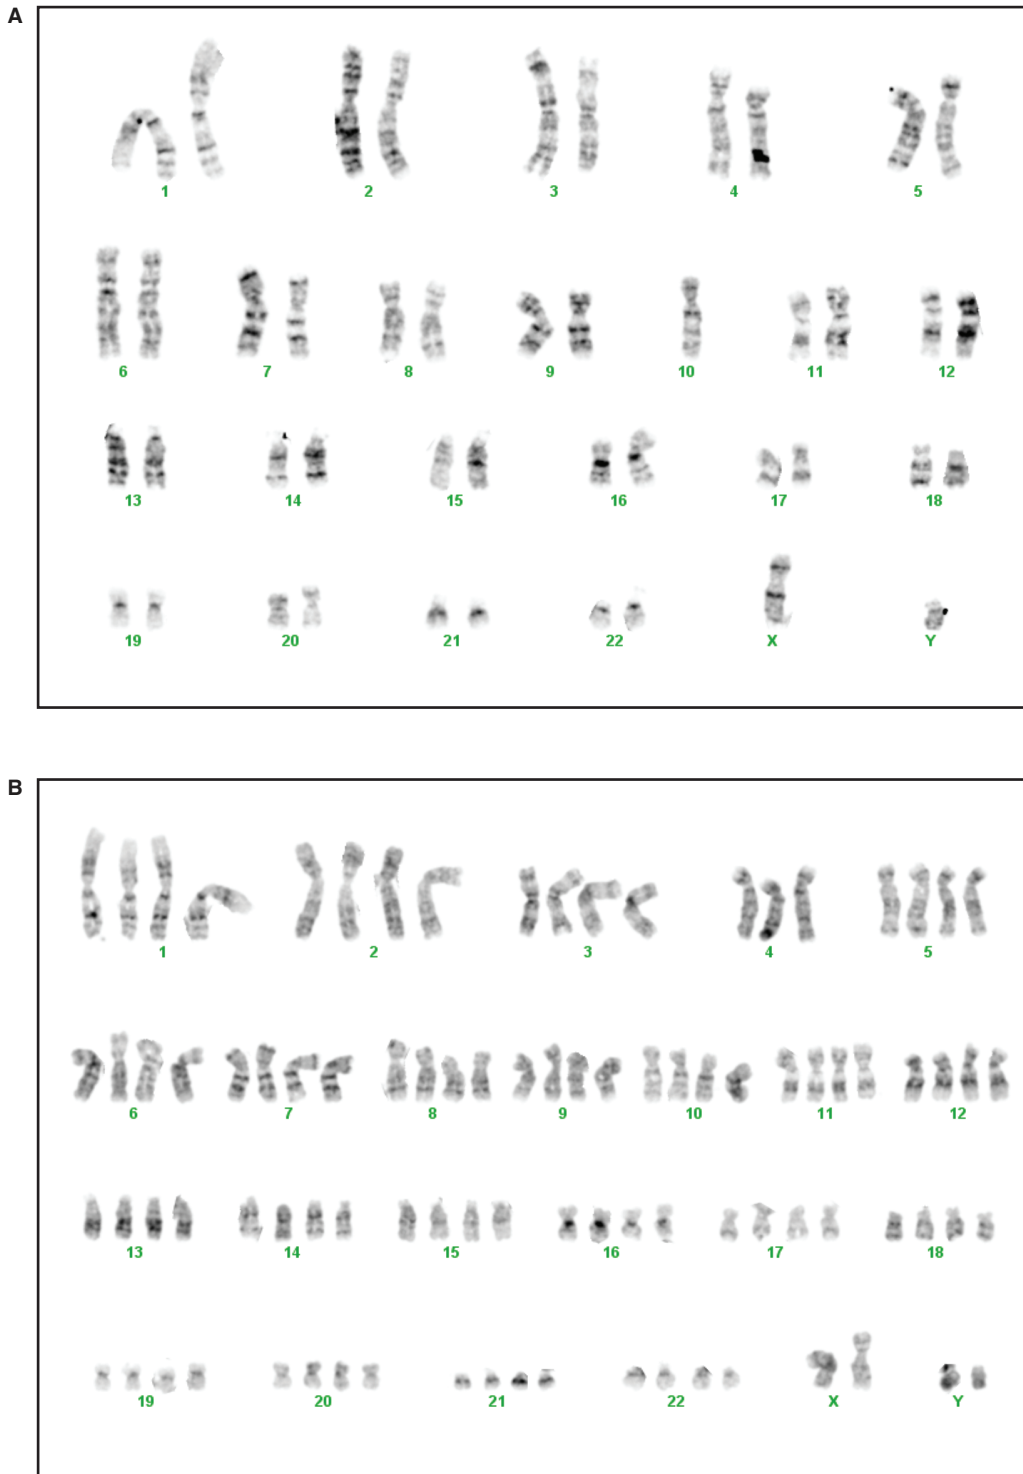

Karyotypes of aneuploid hepatocytes. A, This karyotype of a diploid hepatocyte from a male donor illustrates monosomy of chromosome 10. B, This karyotype of a male tetraploid hepatocyte illustrates loss of a single homologue of chromosome 4.

## Supplementary Figure 2

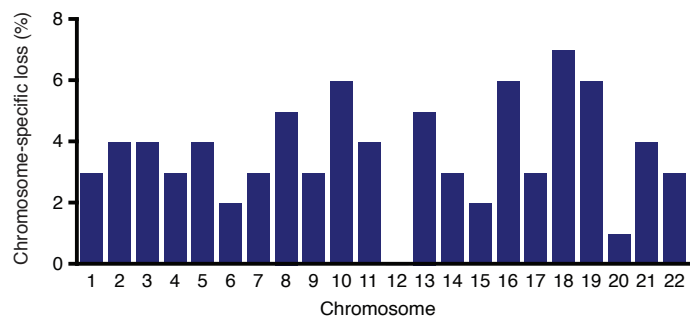

Chromosome loss detected by metaphase karyotyping.  
The frequency of hepatocyte chromosome-specific loss is shown (n=100 karyotypes from 5 donors).

### Supplementary Figure 3

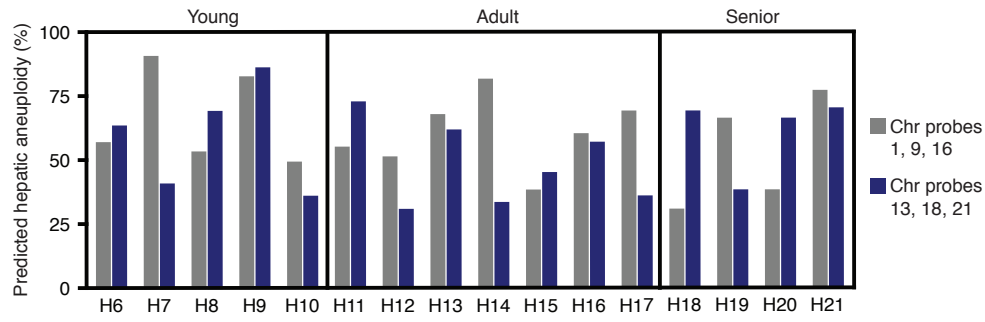

Hepatic aneuploidy by interphase FISH. The overall degree of hepatic aneuploidy (autosomes only) was calculated for each donor using chromosome probe sets 1, 9, 16 and 13, 18, 21.

## Supplementary Figure 4

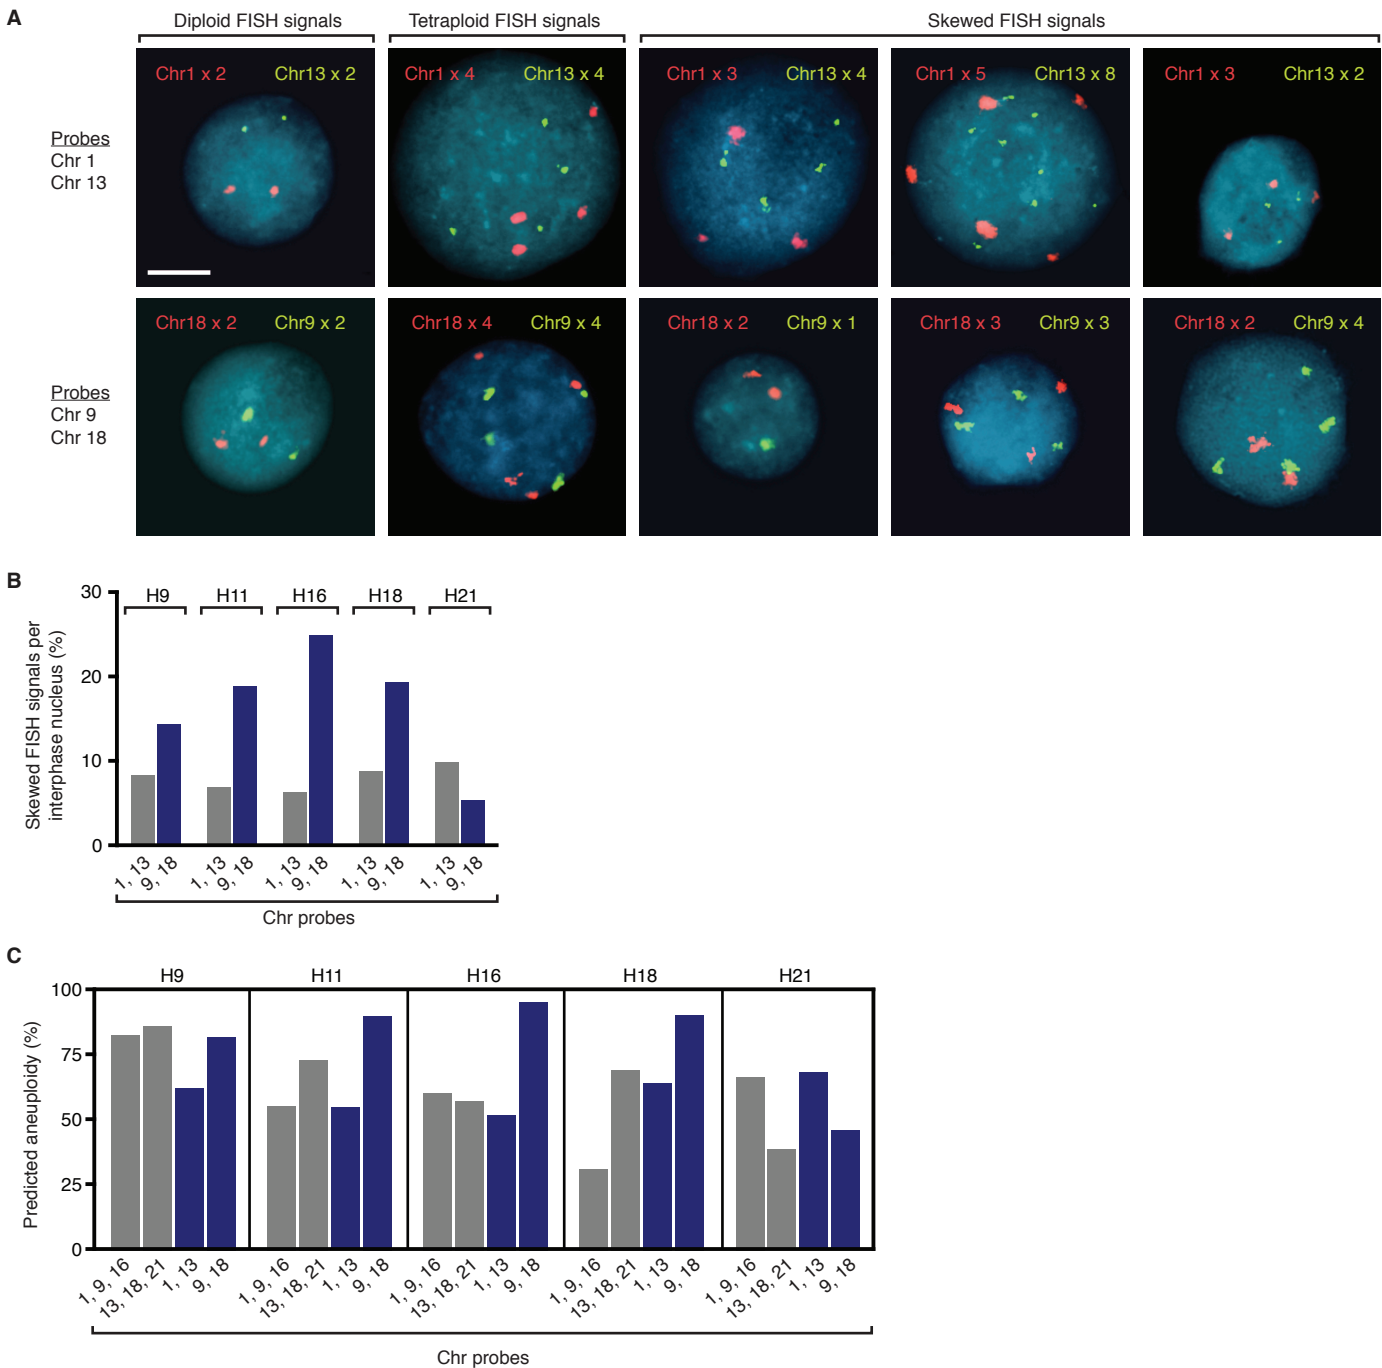

Validation of aneuploidy detected by interphase FISH. To confirm the degree of aneuploidy detected by interphase FISH, hepatocyte nuclei from 5 donors (H9, H11, H16, H18, H21) were independently hybridized with additional sets of chromosome probes. Probes for chromosomes 1, 13 and chromosomes 9, 18 were utilized. Chromatin was visualized with DAPI (blue). FISH signals were quantified in 200 nuclei/sample. A, Representative nuclei are shown for normal diploid and tetraploid hepatocyte nuclei as well as nuclei with abnormal (i.e., aneuploid) numbers of FISH signals. The number of chromosome signals/nucleus is indicated. Scale bar is 10  $\mu$ m. B, Skewed FISH signals were detected in hepatocytes from each donor. C, The degree of hepatic aneuploidy (autosomes only) was calculated for probe sets 1, 13 and 9, 18 and compared to the predicted aneuploidy calculated with probe sets 1, 9, 16 and 13, 18, 21. The percentage of hepatic aneuploidy was similar for each set of probes.
